# Supplementary material
Source: publisher site journal article supplement (https://static.cambridge.org/content/id/urn:cambridge.org:id:article:S204017441900045X/resource/name/S204017441900045Xsupp001.pdf)

Fig S2: Scatter Plot of the Correlation between Birth Weight and CVD Risk Factors

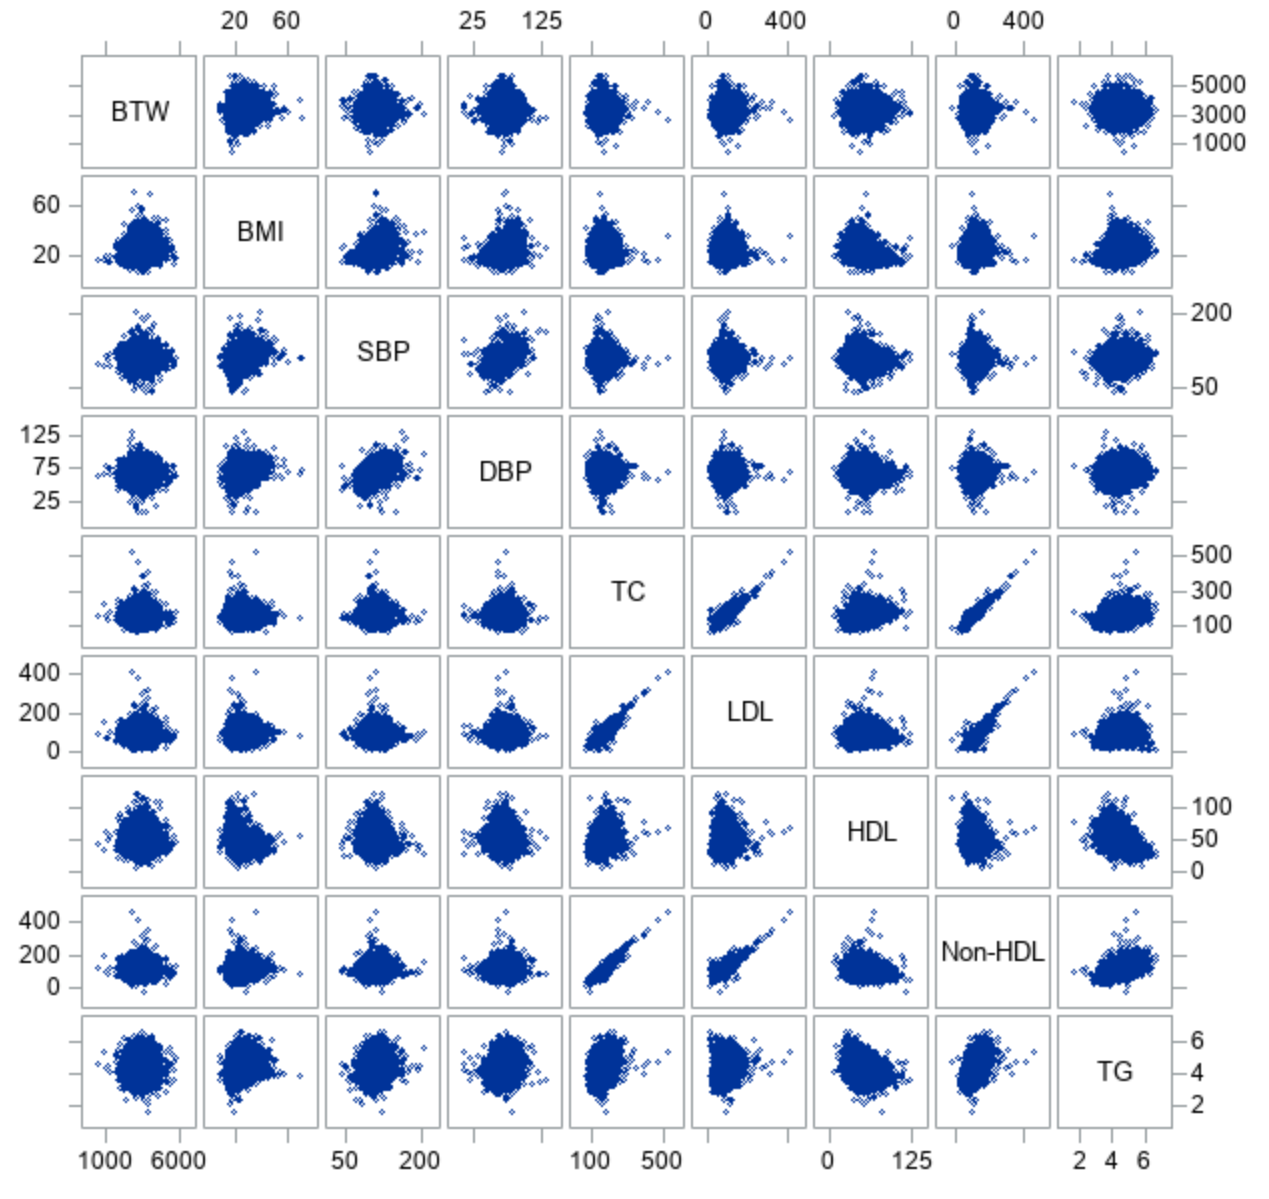

Supplement: Supplementary file 1 [file S204017441900045Xsupp001.pdf]
